# Supplementary material for: Inhibition of 11β-HSD1 by Tetracyclic Triterpenoids from Euphorbia kansui
Source: MDPI journal article supplement (doi:10.3390/molecules171011826), 2012-10-09
Supplement: s1 [file s1]

# Supplementary Material

## Inhibition of 11 $\beta$ -HSD1 by Tetracyclic Triterpenoids from *Euphorbia kansui*

Figure S1. <sup>1</sup>H-NMR Spectrum of **3** in CDCl<sub>3</sub>.

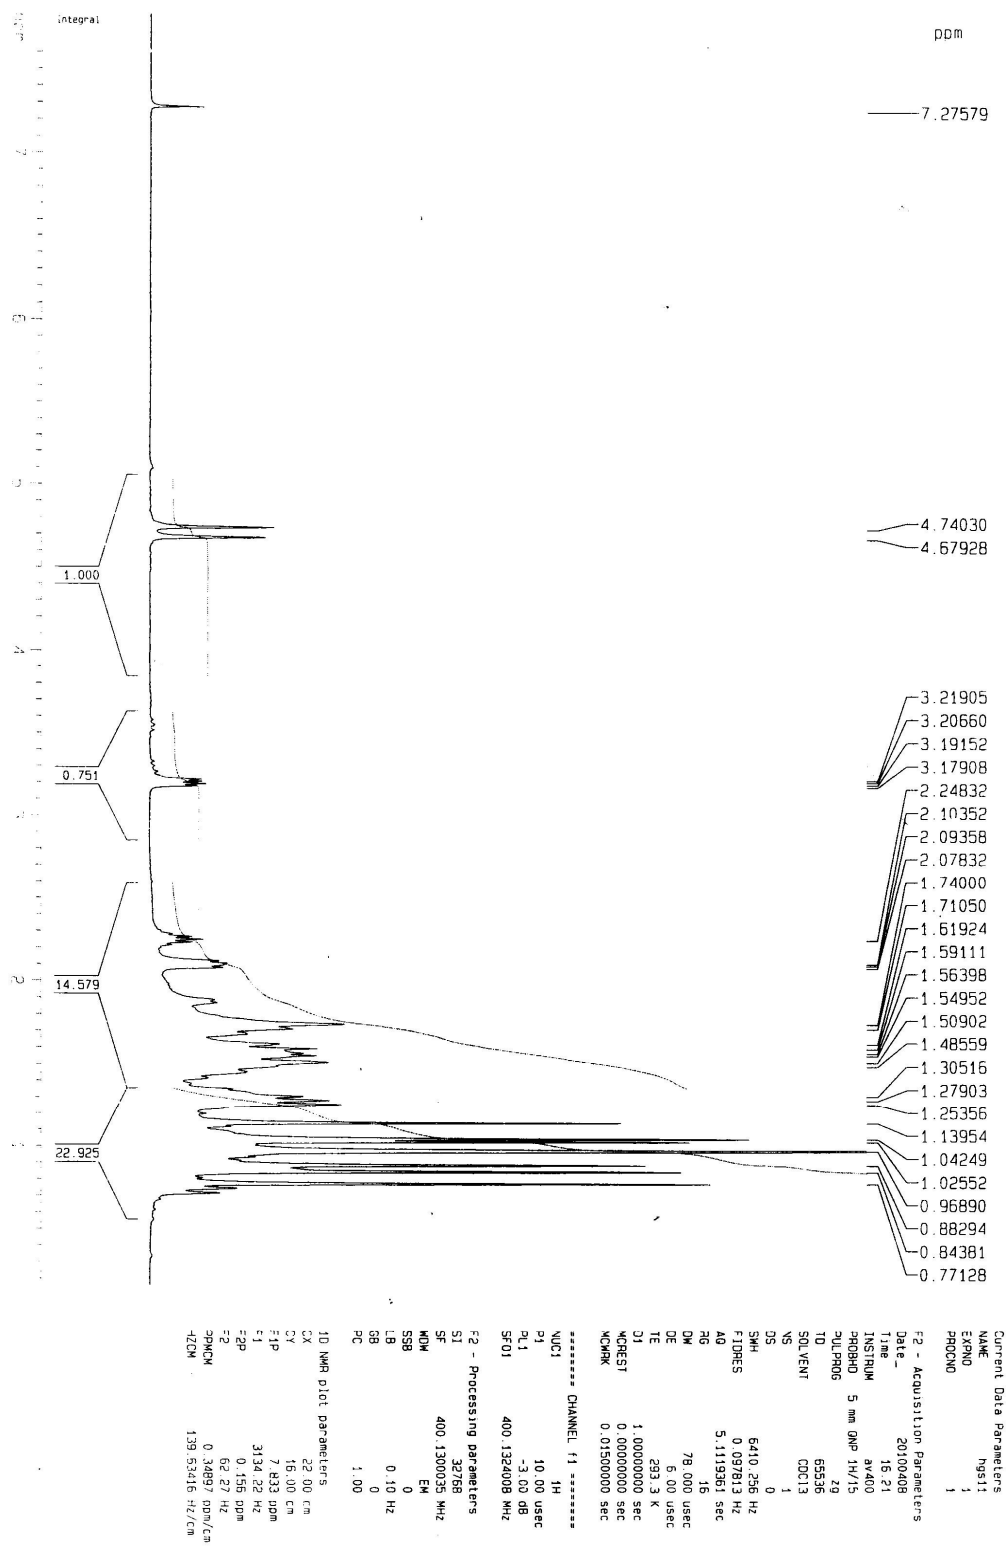

Figure S2.  $^{13}\text{C}$  and DEPT NMR Spectrum of **3** in  $\text{CDCl}_3$ .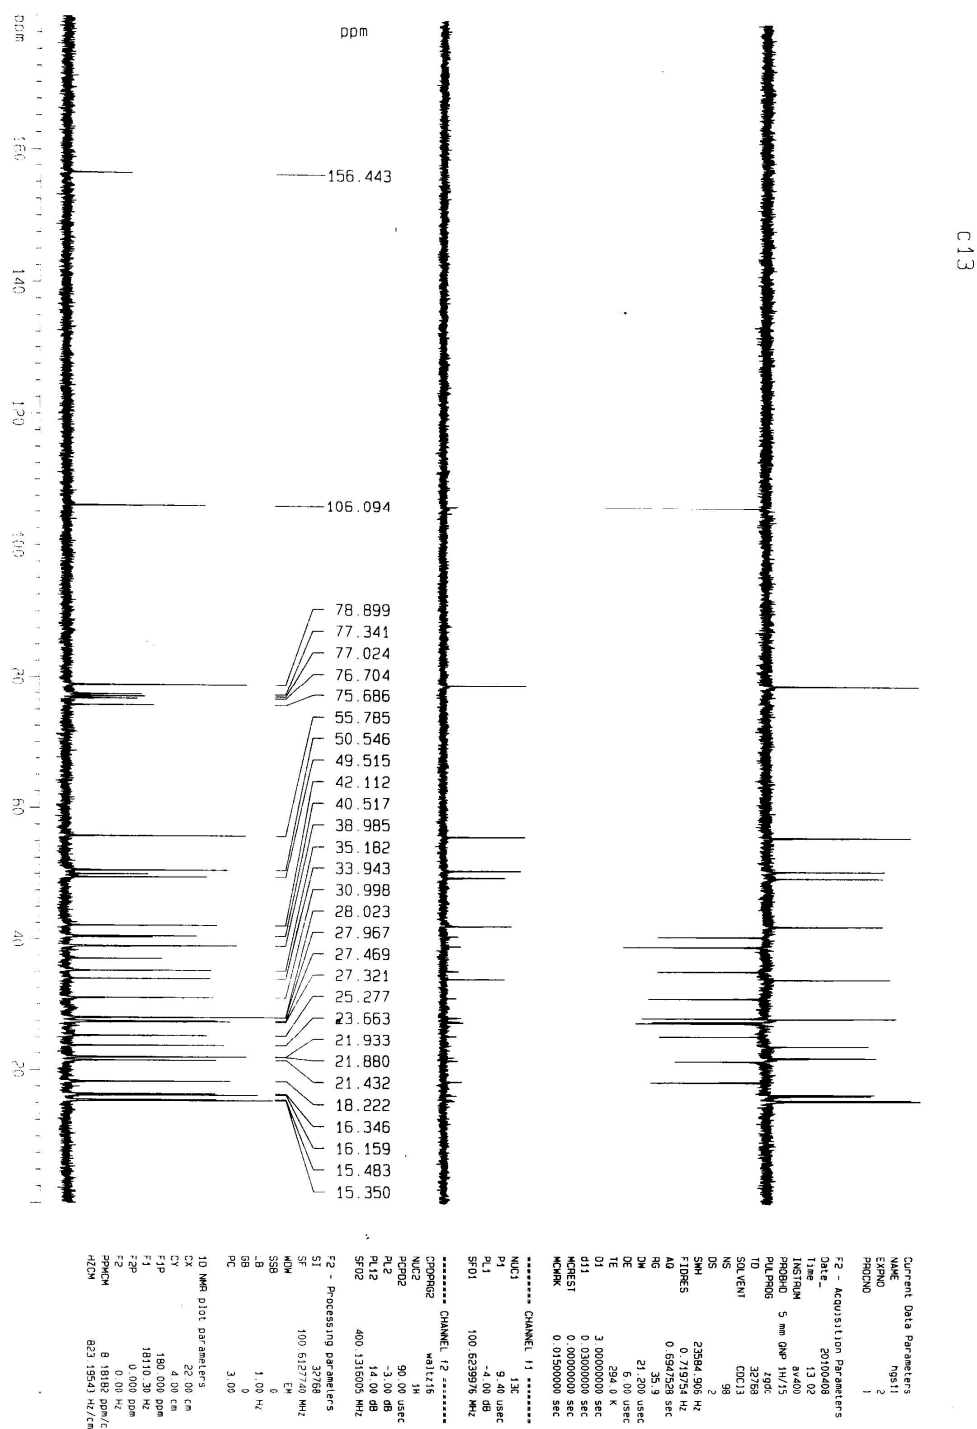

Figure S3. HSQC Spectrum of **3** in CDCl<sub>3</sub>.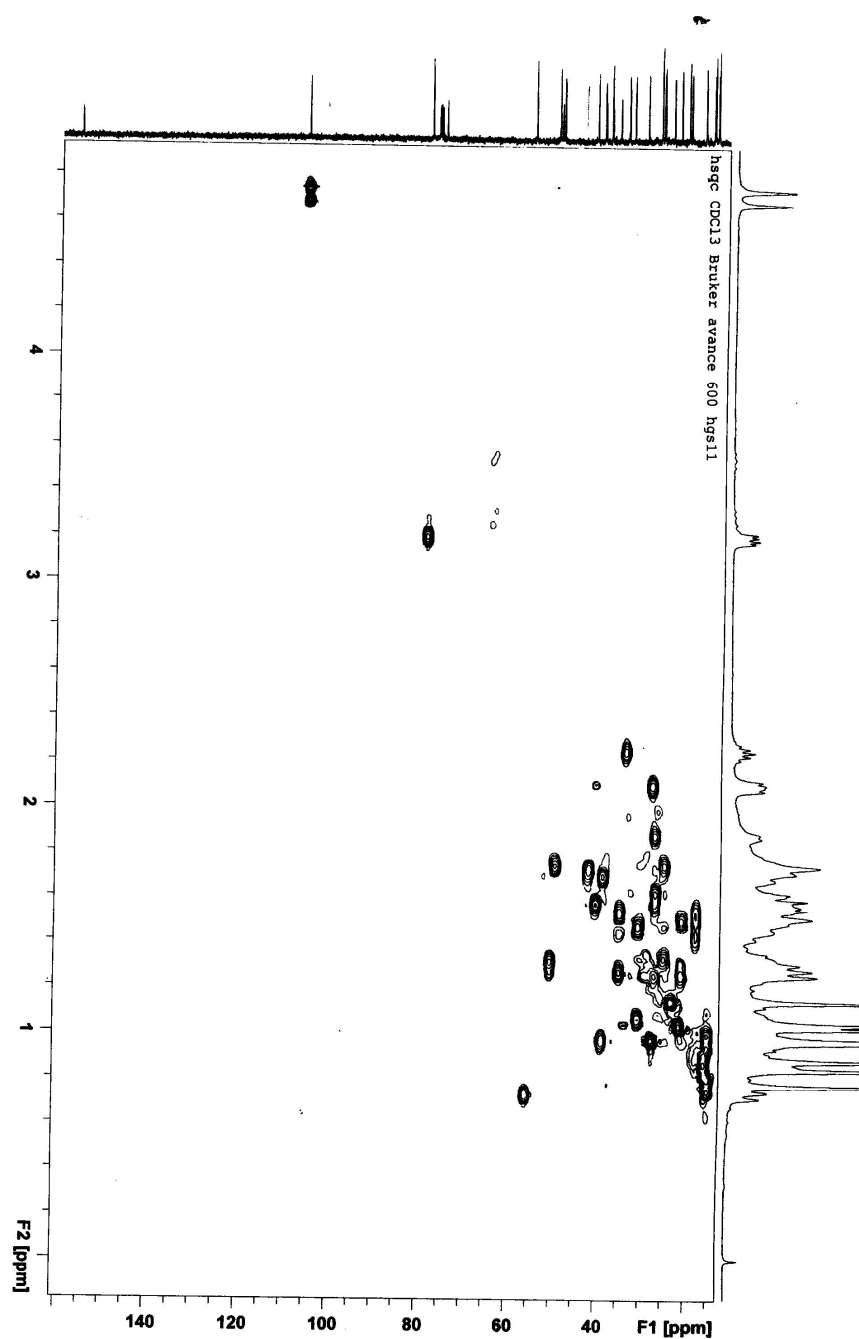

**Figure S4.**  $^1\text{H}$ - $^1\text{H}$  COSY Spectrum of **3** in  $\text{CDCl}_3$ .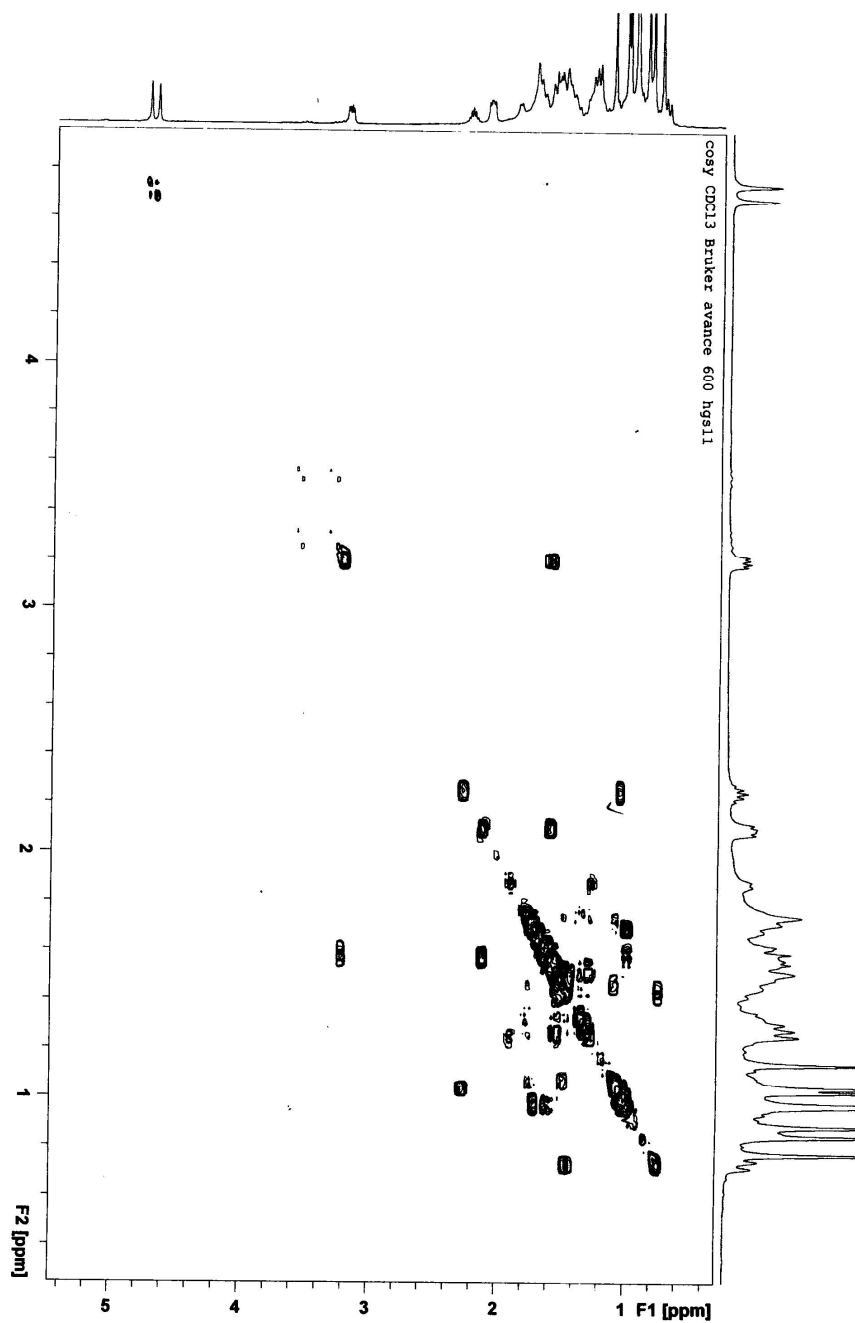

Figure S5. HMBC Spectrum of 3 in CDCl<sub>3</sub>.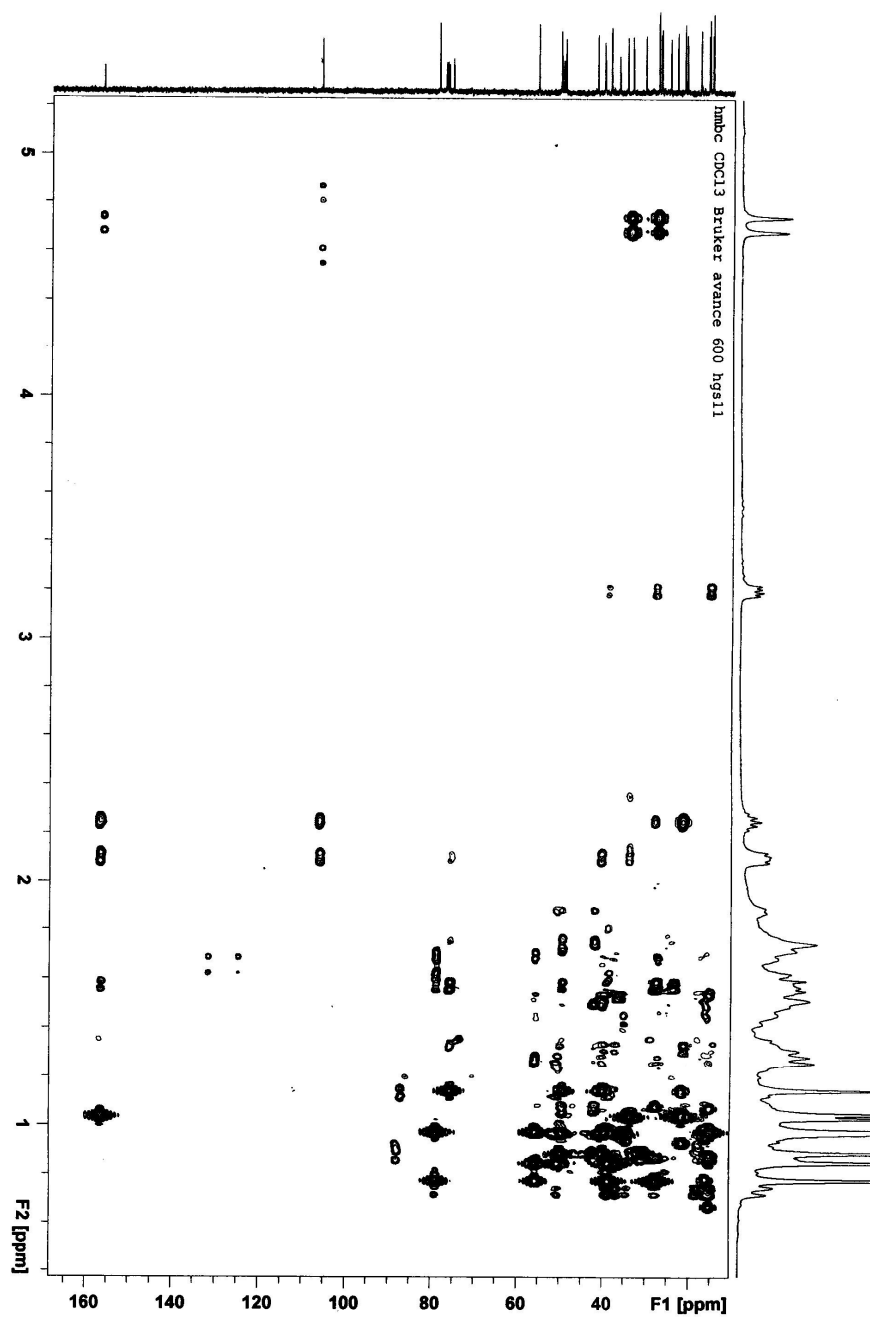

Figure S6. ROESY Spectrum of **3** in CDCl<sub>3</sub>.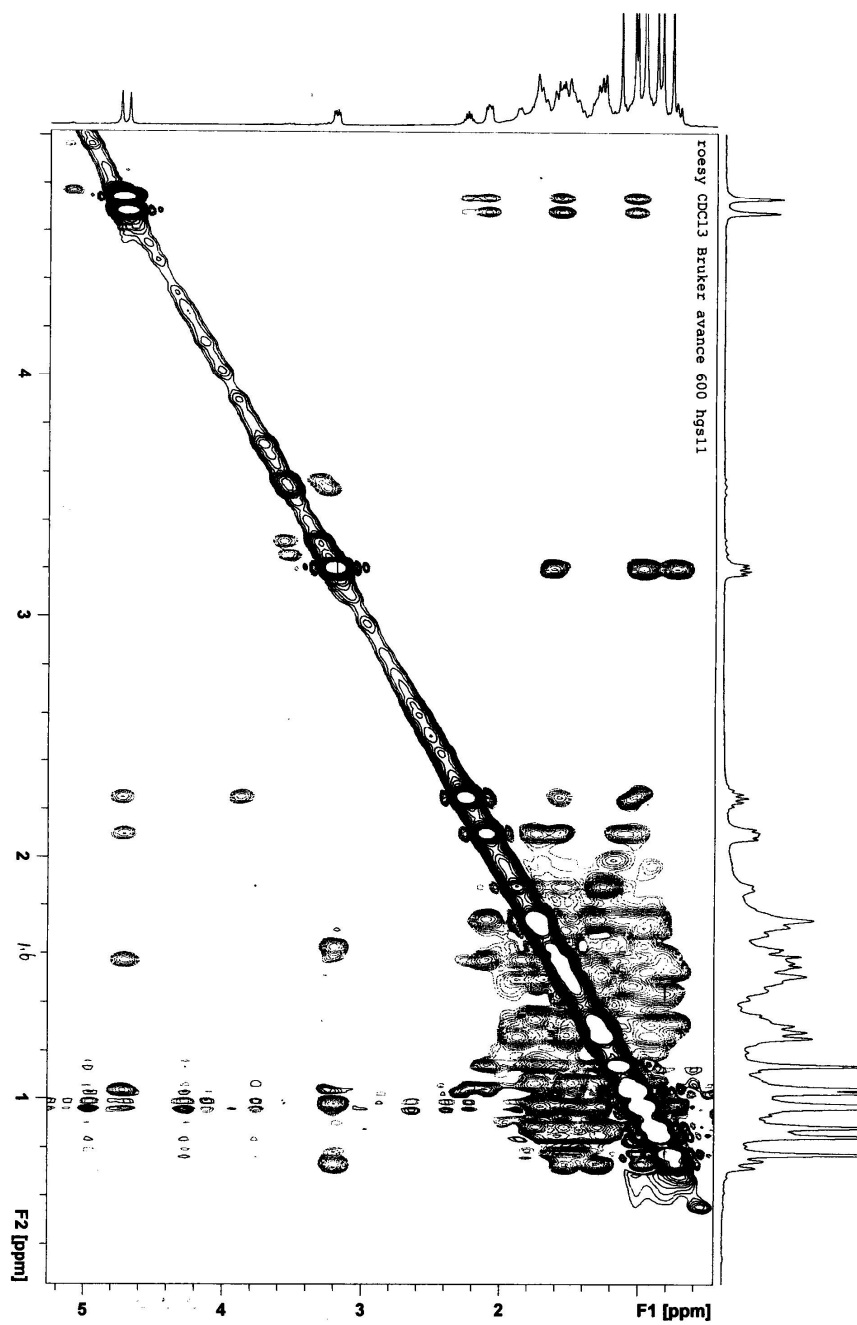

Figure S7. EI Mass Spectrometry of 3.

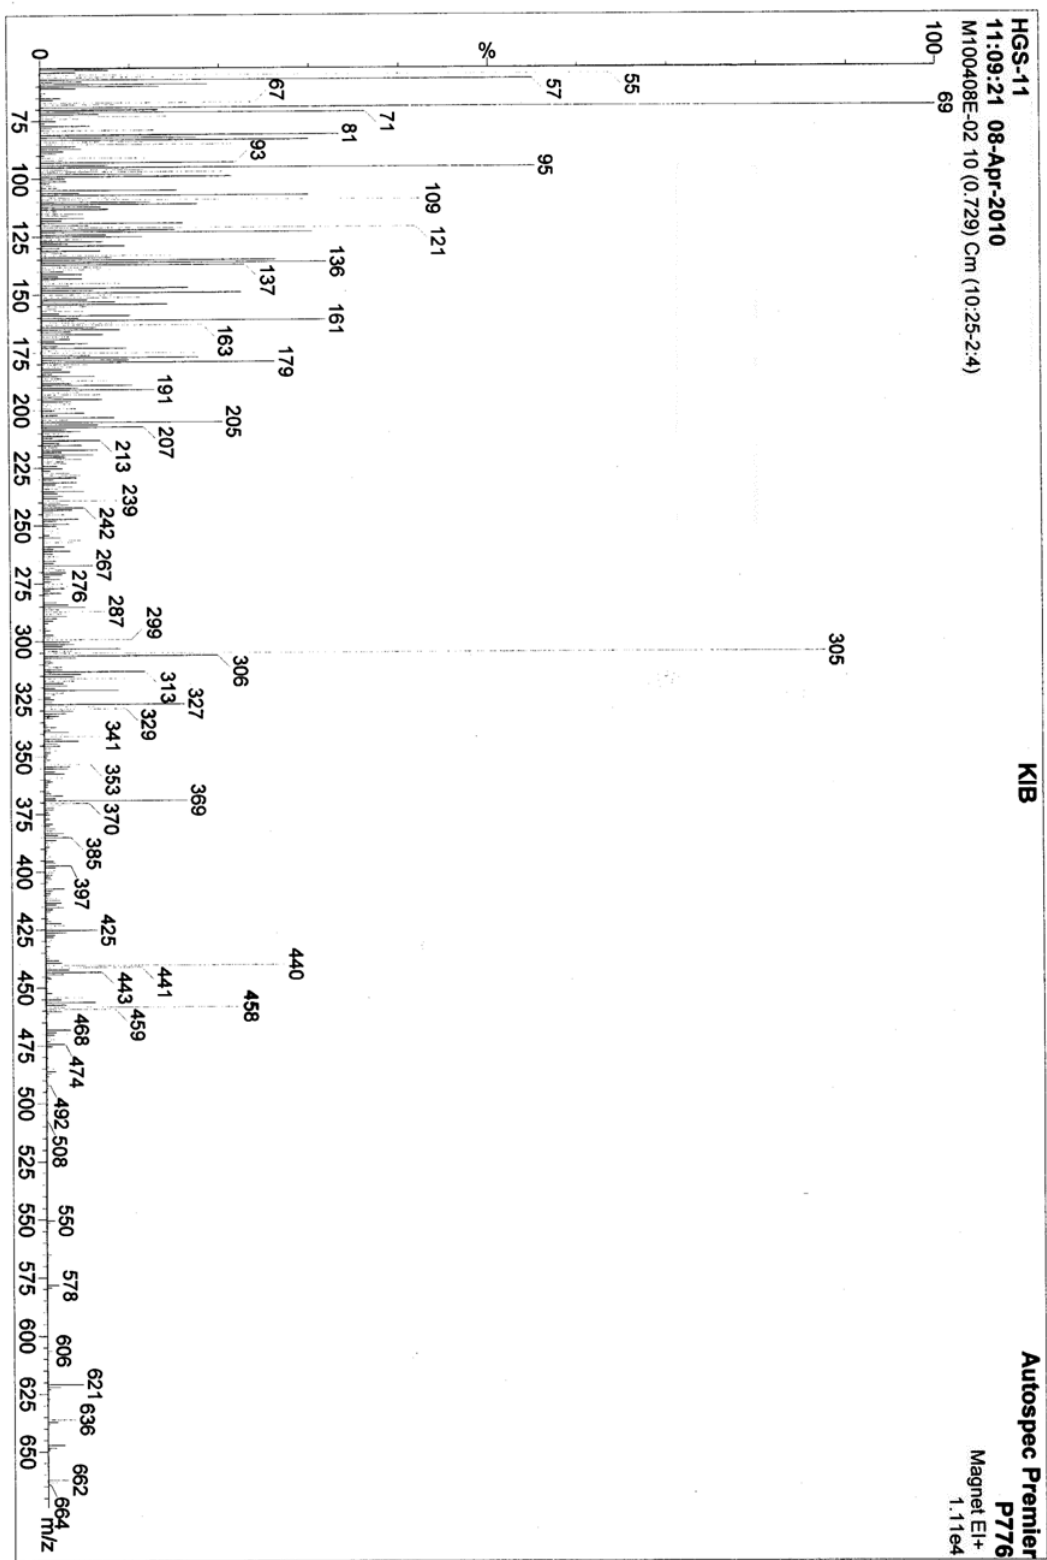

Figure S8.  $^1\text{H}$ -NMR Spectrum of **1** in  $\text{CDCl}_3$ .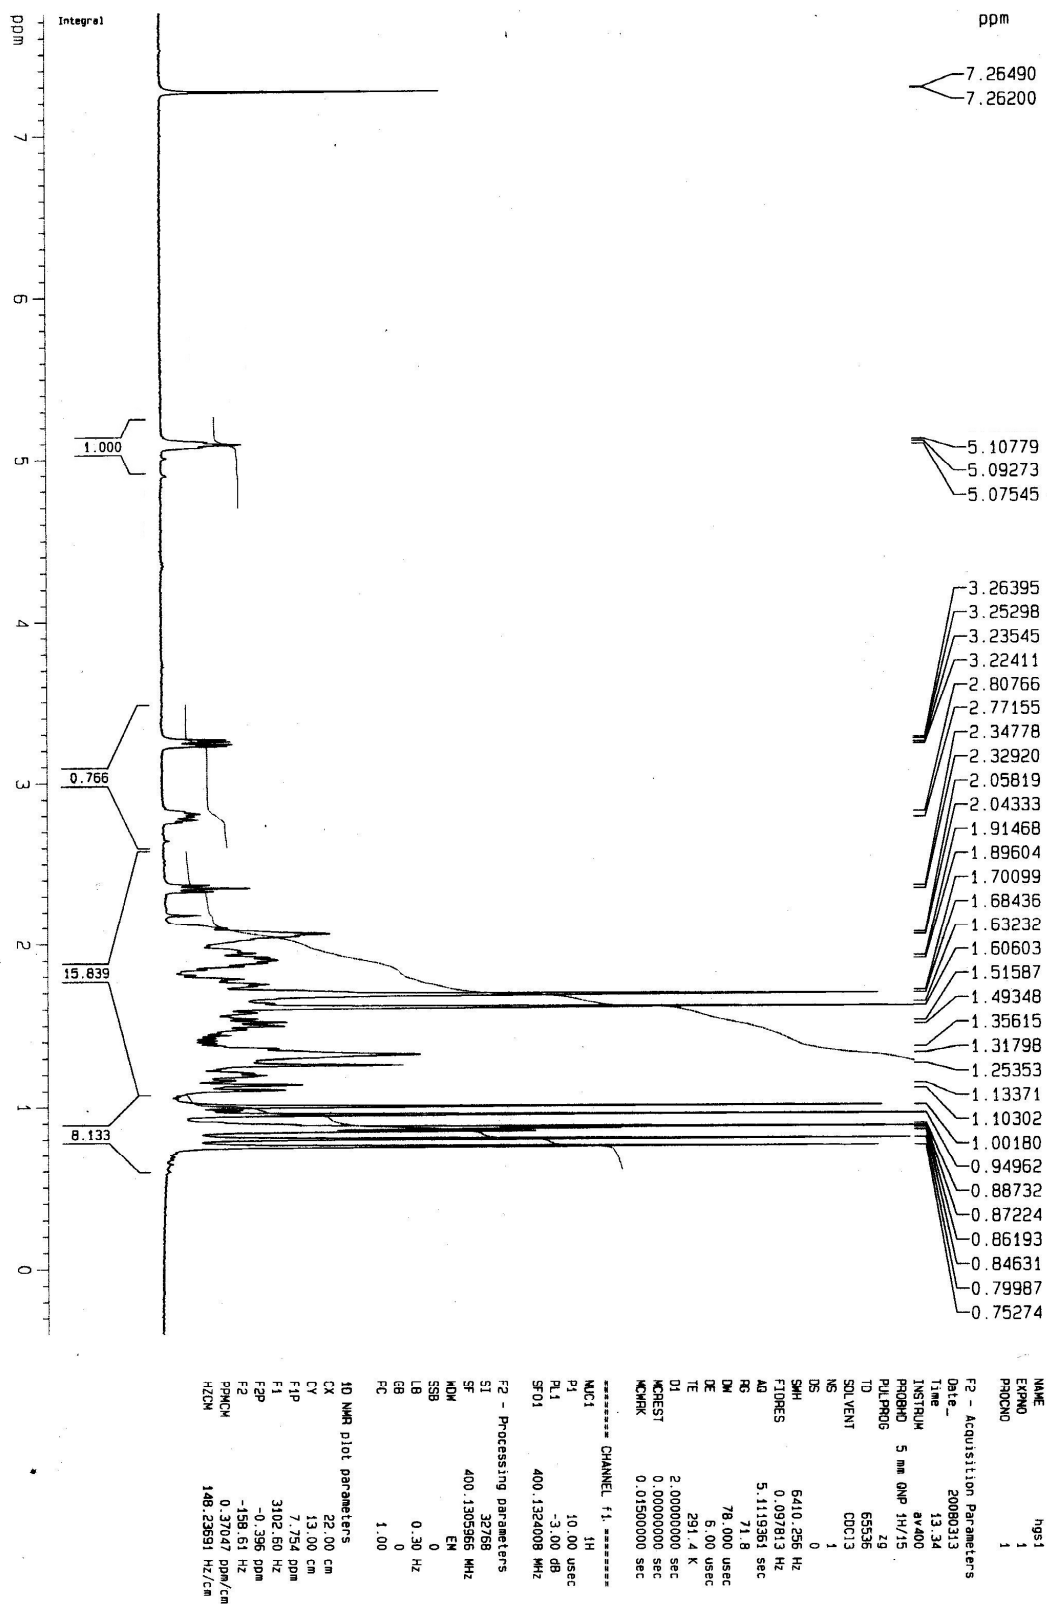



Figure S9.  $^{13}\text{C}$ -NMR Spectrum of 1 in  $\text{CDCl}_3$ .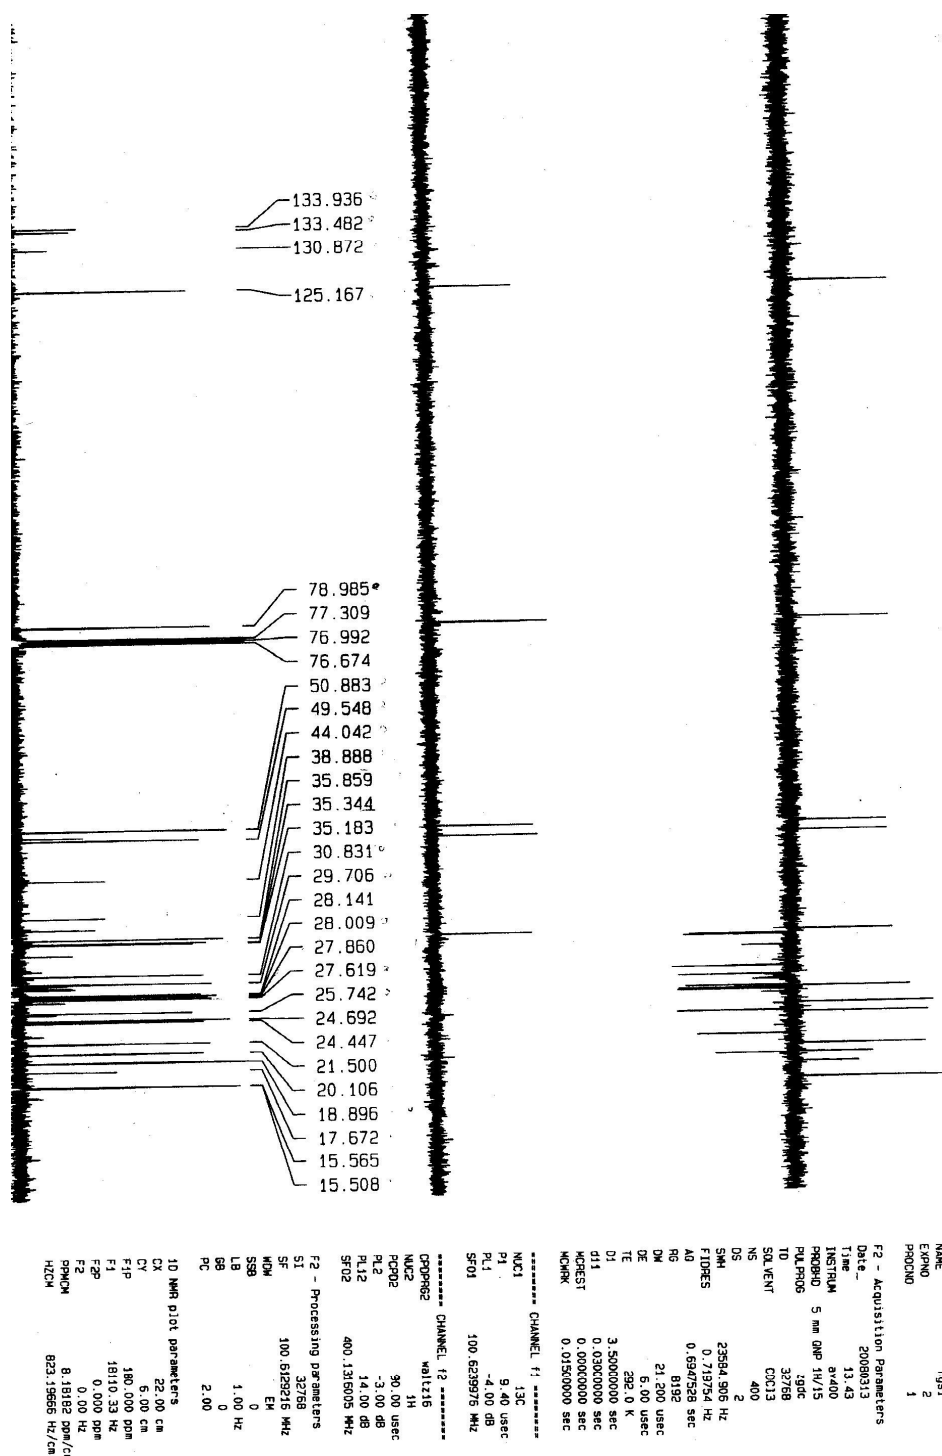

Figure S10.  $^1\text{H}$ -NMR Spectrum of **2** in  $\text{CDCl}_3$ .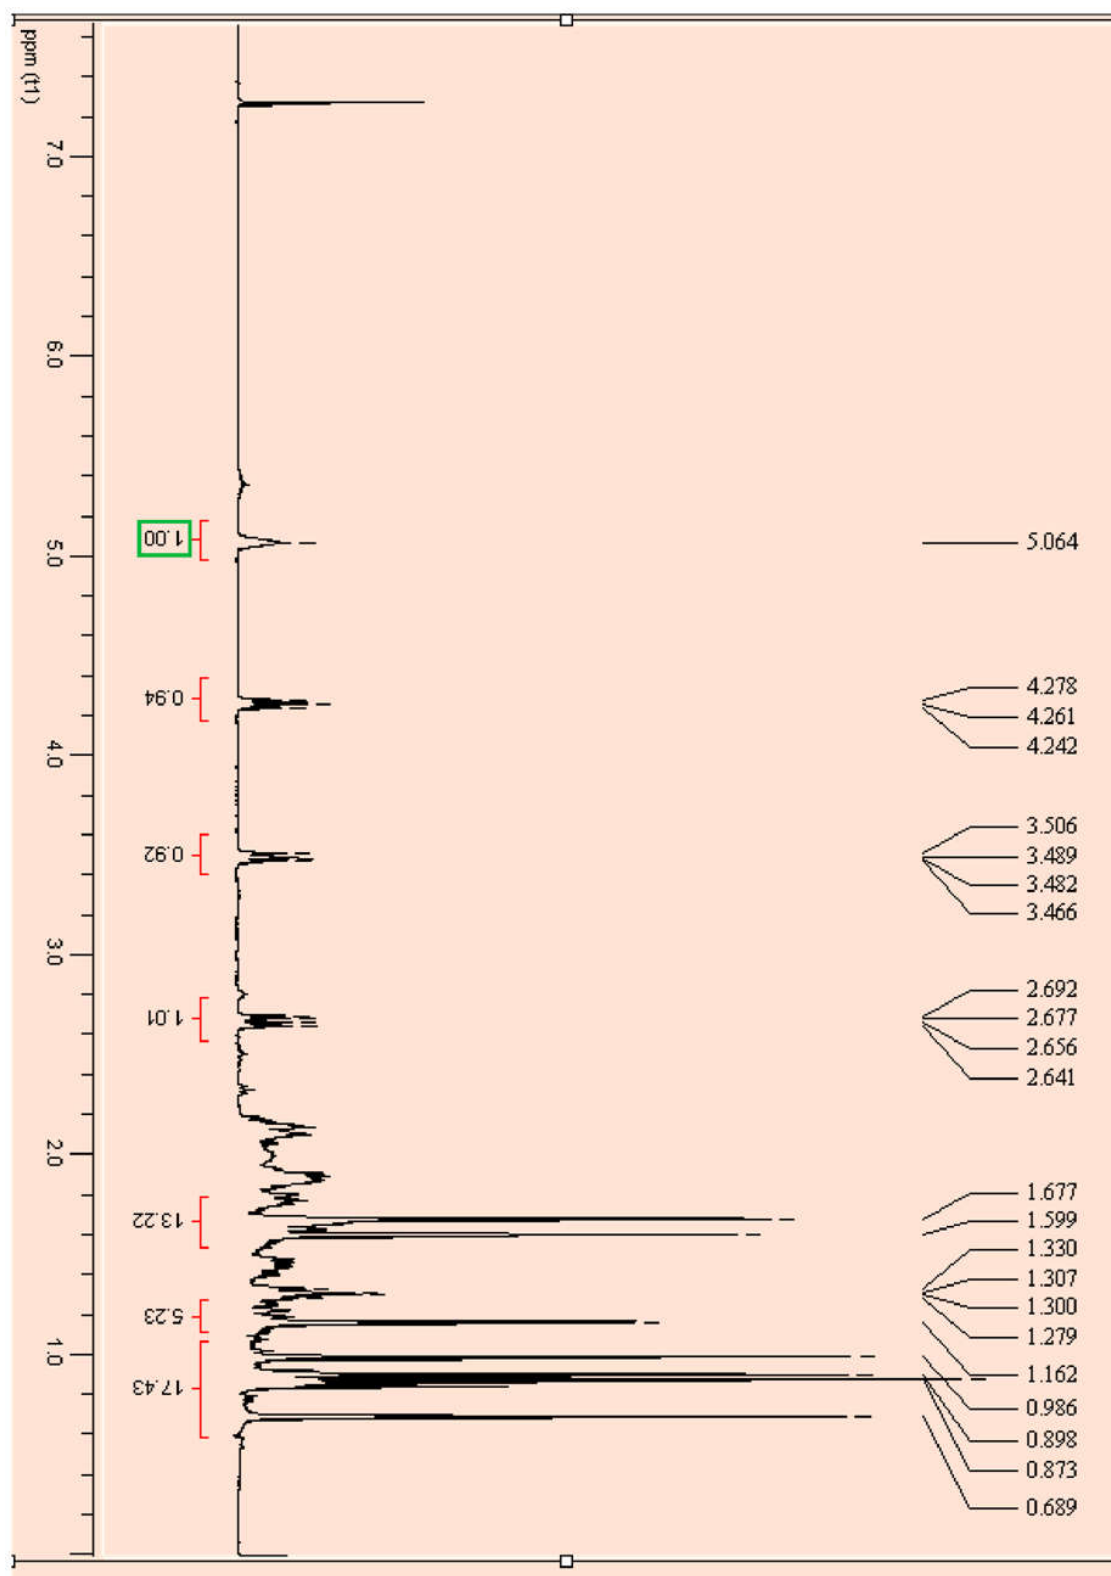

ppm

219.302

131.202

124.875

124.793

79.273

77.341

77.024

76.706

76.342

61.647

61.565

61.441

49.618

47.845

45.872

37.897

35.302

34.849

31.471

29.770

29.744

28.278

26.816

25.750

24.513

24.176

22.382

18.605

17.538

16.792

16.641

| Current Data Parameters     |                  |
|-----------------------------|------------------|
| NAME                        | Units            |
| PROGNO                      | 1                |
| EXNO                        | 3                |
| F2 - Acquisition Parameters |                  |
| Date=                       | 20080627         |
| Time                        | 0.11             |
| INSTNUM                     | 8v400            |
| PROBHD                      | 5 mm DNP 1H/15   |
| PL1PROG                     | 2dcf             |
| TD                          | 32768            |
| SOLVENT                     | CDCl3            |
| NS                          | 268              |
| DS                          | 2                |
| SWH                         | 23584.906 Hz     |
| F1-FREQS                    | 0.7195154 Hz     |
| RG                          | 0.6597528 sec    |
| DE                          | 31.50 sec        |
| DM                          | 21.200 usec      |
| DE                          | 6.00 usec        |
| TE                          | 291.7 K          |
| TD                          | 3.0000000 sec    |
| TD                          | 0.0300000 sec    |
| MGEST                       | 0.0000000 sec    |
| MCORR                       | 0.01350000 sec   |
| ===== CHANNEL 1: =====      |                  |
| MU1                         | 13C              |
| p1                          | -9.40 usec       |
| PL1                         | -4.00 dB         |
| SFO1                        | 100.6259976 MHz  |
| ===== CHANNEL 12 =====      |                  |
| PROBHD                      | NO116            |
| CPROG                       | 1H               |
| MU2                         | 90.00 usec       |
| PROG2                       | -3.00 dB         |
| PL2                         | -4.00 dB         |
| PL12                        | 14.00 dB         |
| SFO2                        | 400.1316005 MHz  |
| F2 - Processing Parameters  |                  |
| F1                          | 32768            |
| SWH                         | 100.6127720 MHz  |
| QFM                         | EM               |
| SSB                         | 0                |
| LB                          | 1.00 Hz          |
| GB                          | 0                |
| PC                          | 2.00             |
| 10 NMR Plot Parameters      |                  |
| CX                          | 22.00 cm         |
| LY                          | 6.00 cm          |
| F1P                         | 220.000 ppm      |
| F2P                         | 223.4181 Hz      |
| CP                          | 0.000 ppm        |
| F2                          | 0.00 Hz          |
| PCP                         | 10.00000 ppm/cm  |
| YDUM                        | 1500.12769 Hz/cm |

Figure S12.  $^1\text{H}$ -NMR Spectrum of **4** in  $\text{CDCl}_3$ .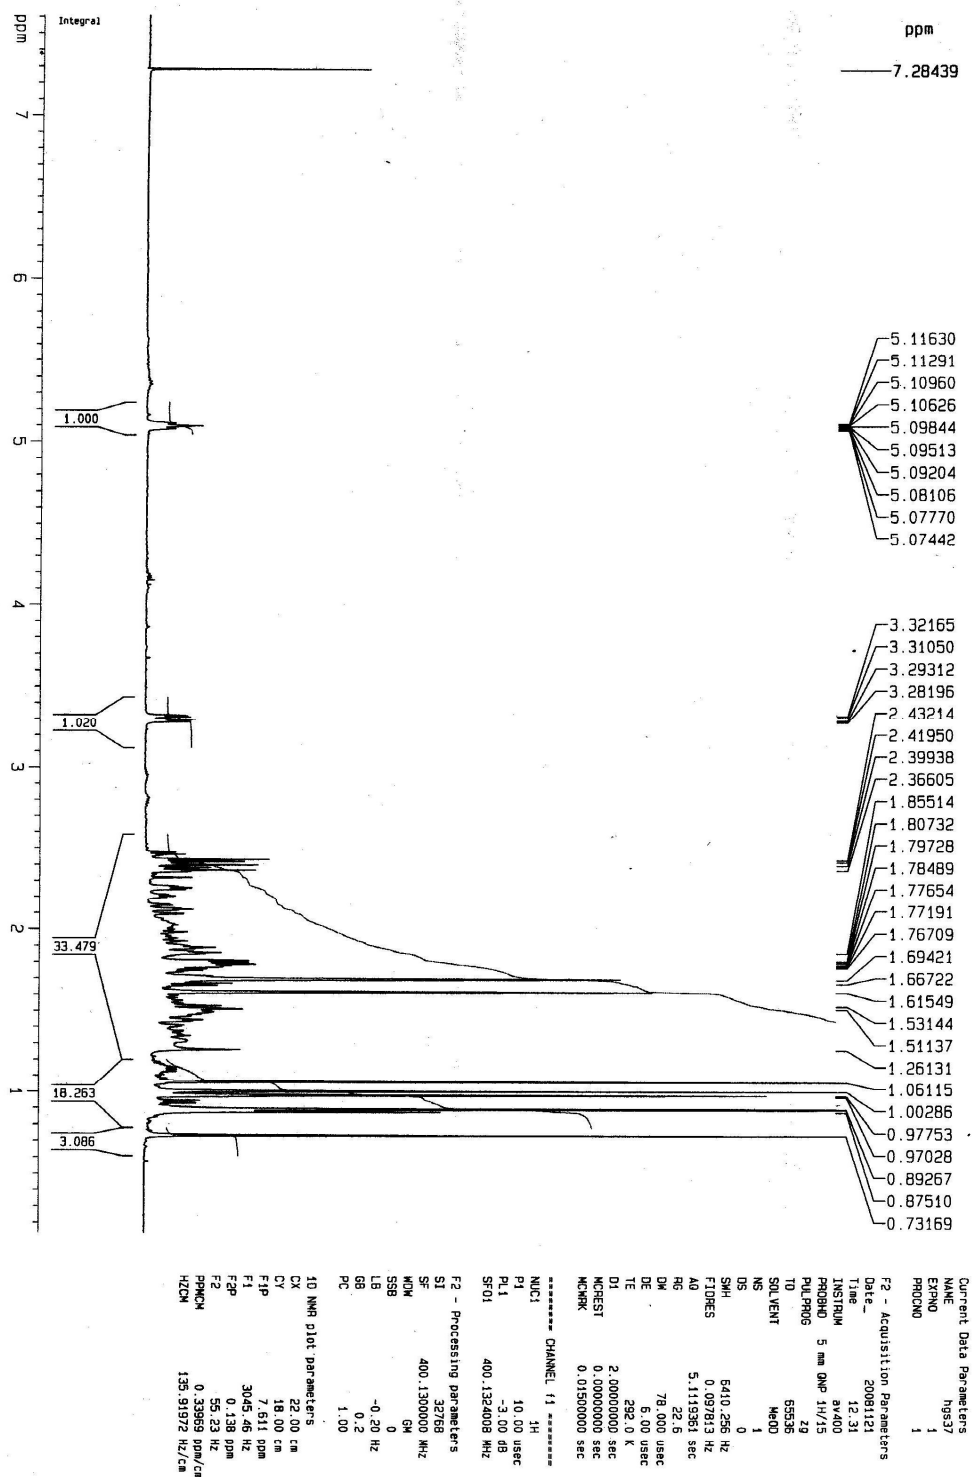

Figure S13.  $^{13}\text{C}$ -NMR Spectrum of **4** in  $\text{CDCl}_3$ .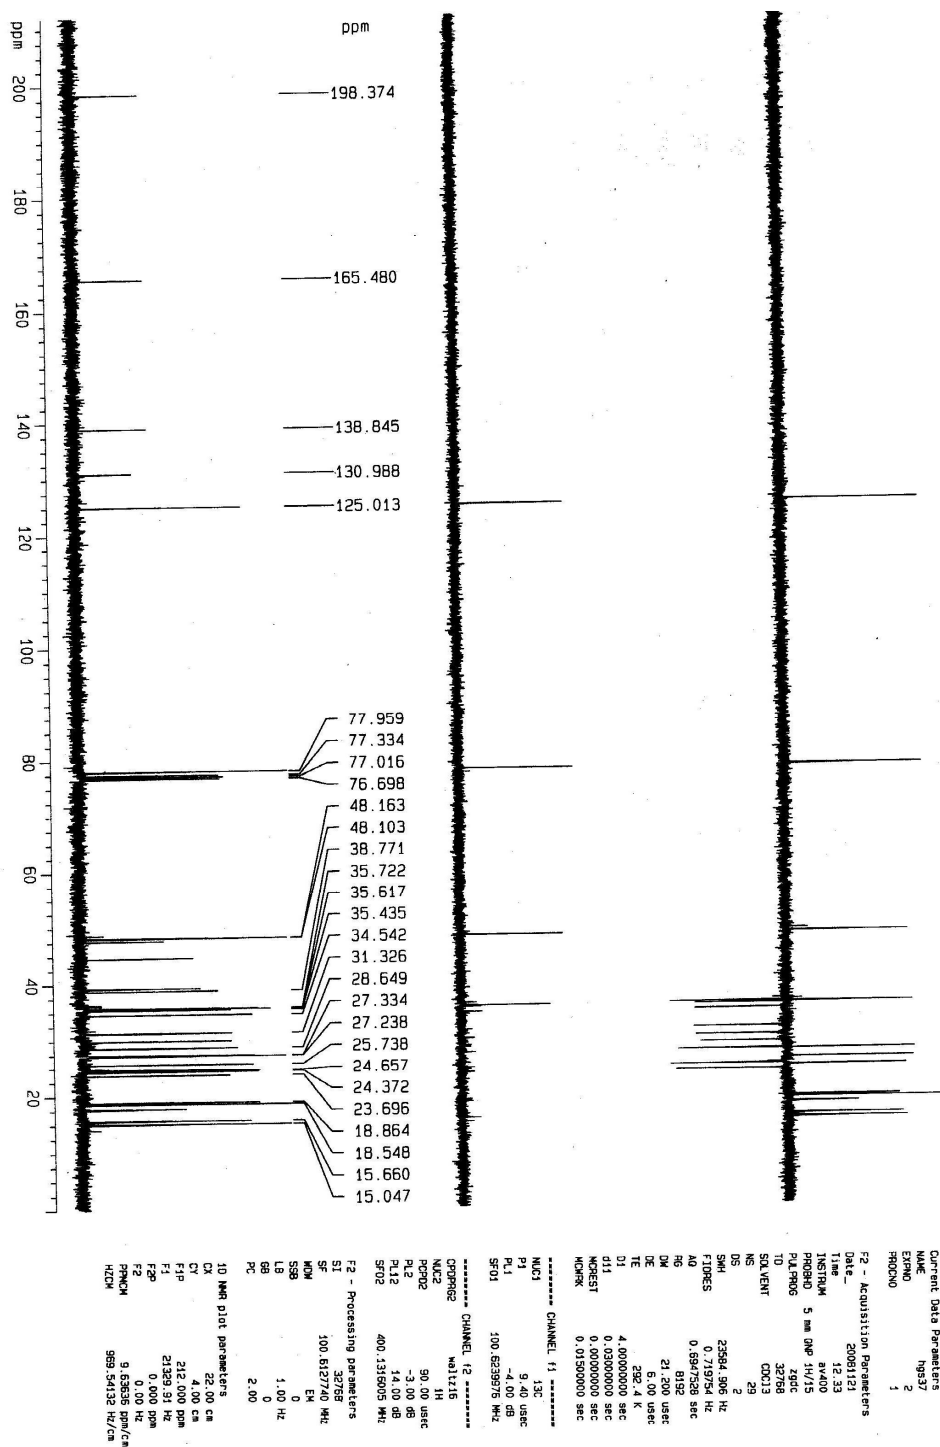

Figure S14.  $^1\text{H}$ -NMR Spectrum of **5** in  $\text{CDCl}_3$ .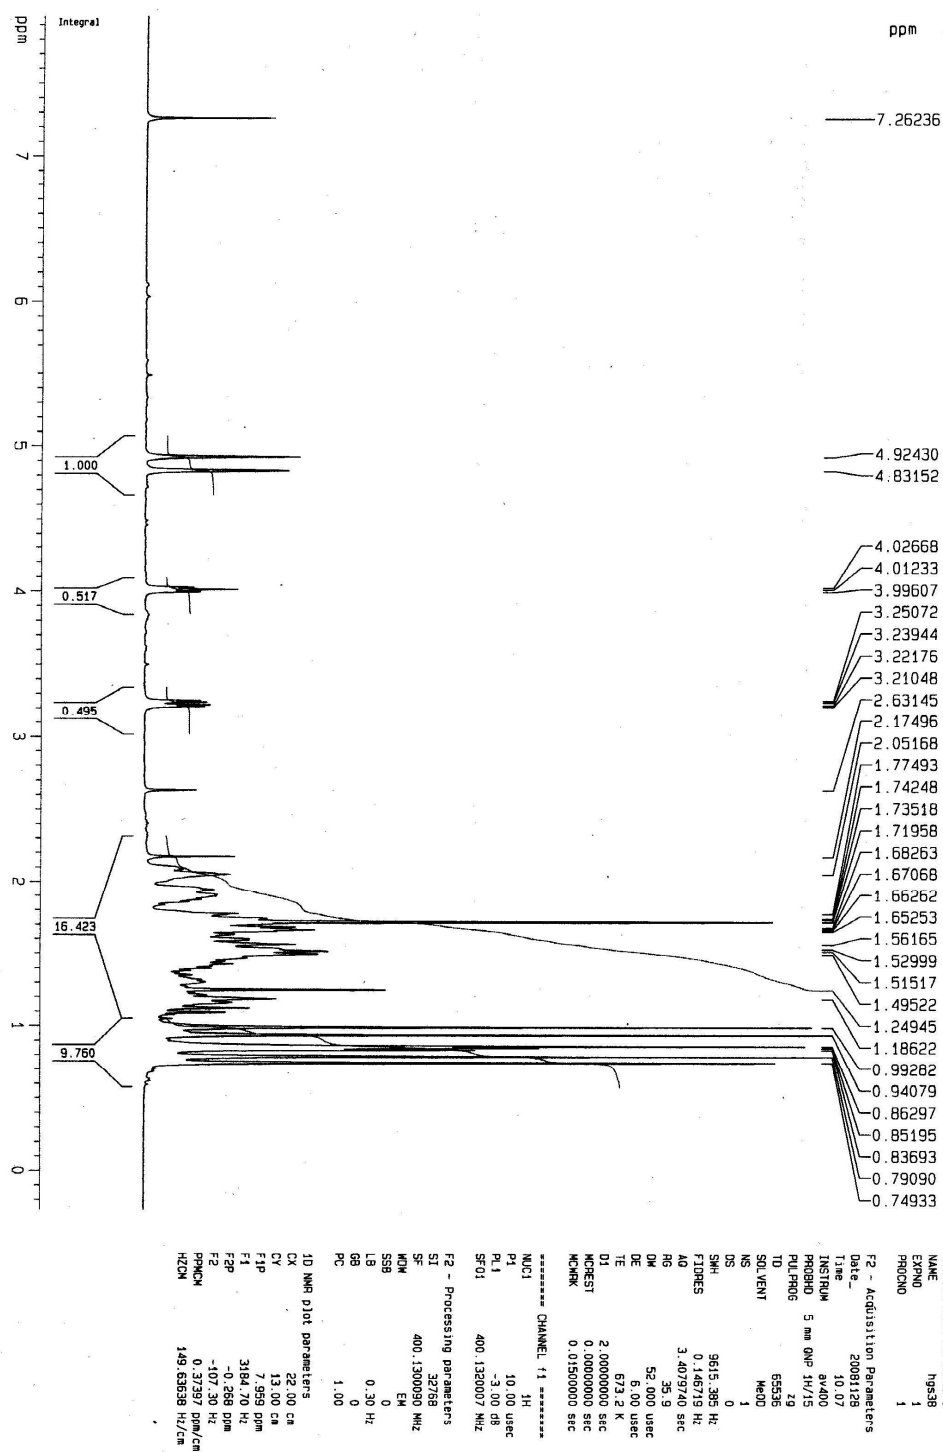

Figure S15.  $^{13}\text{C}$ -NMR Spectrum of **5** in  $\text{CDCl}_3$ .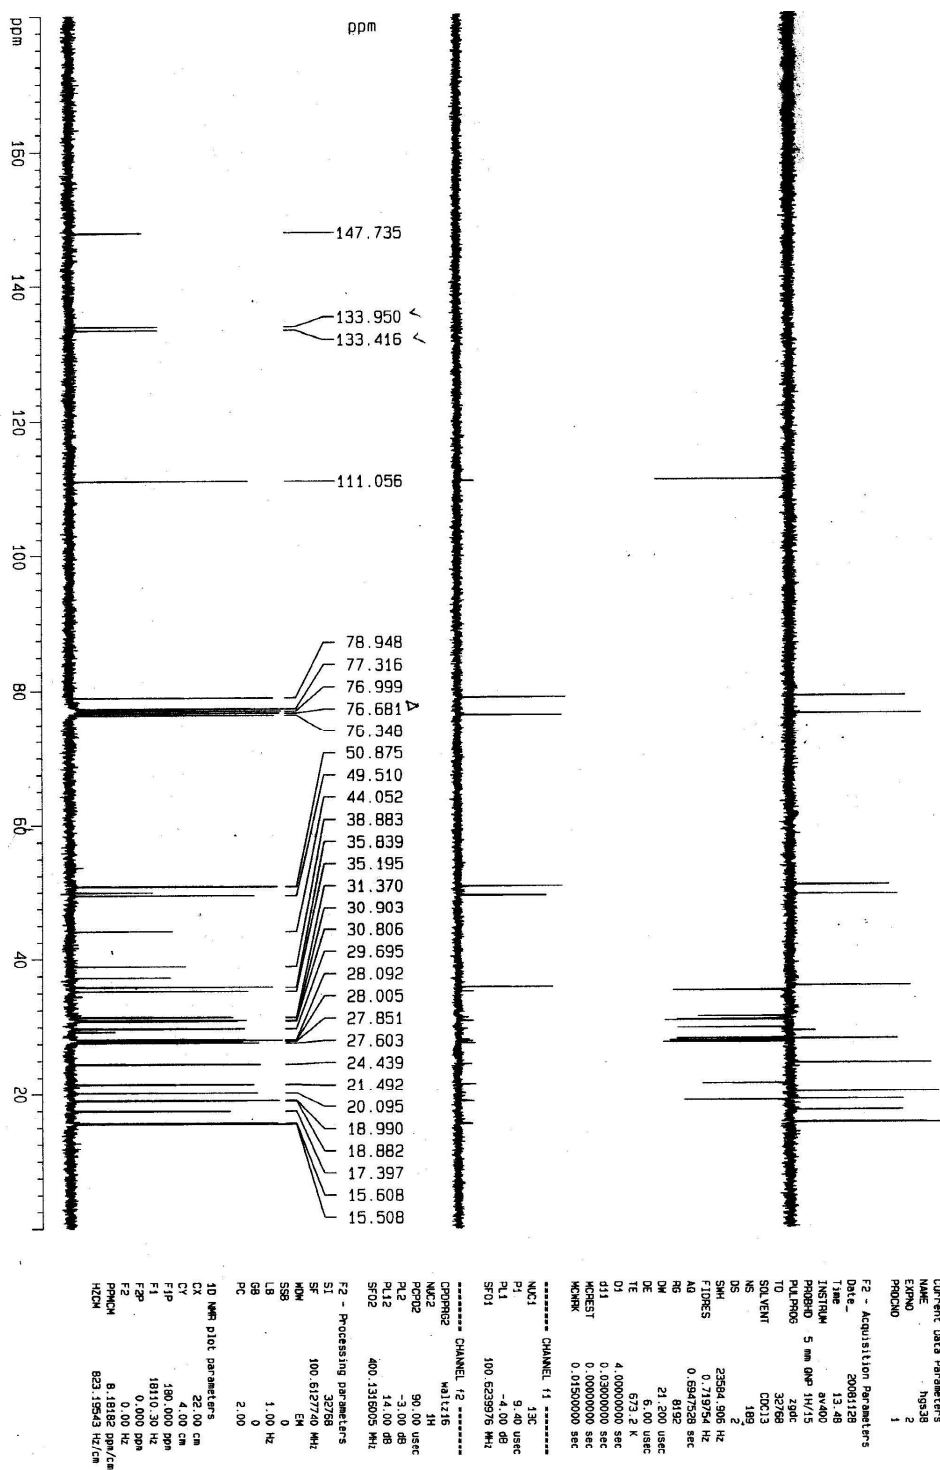

Figure S16.  $^1\text{H}$ -NMR Spectrum of 6 in  $\text{CDCl}_3$ .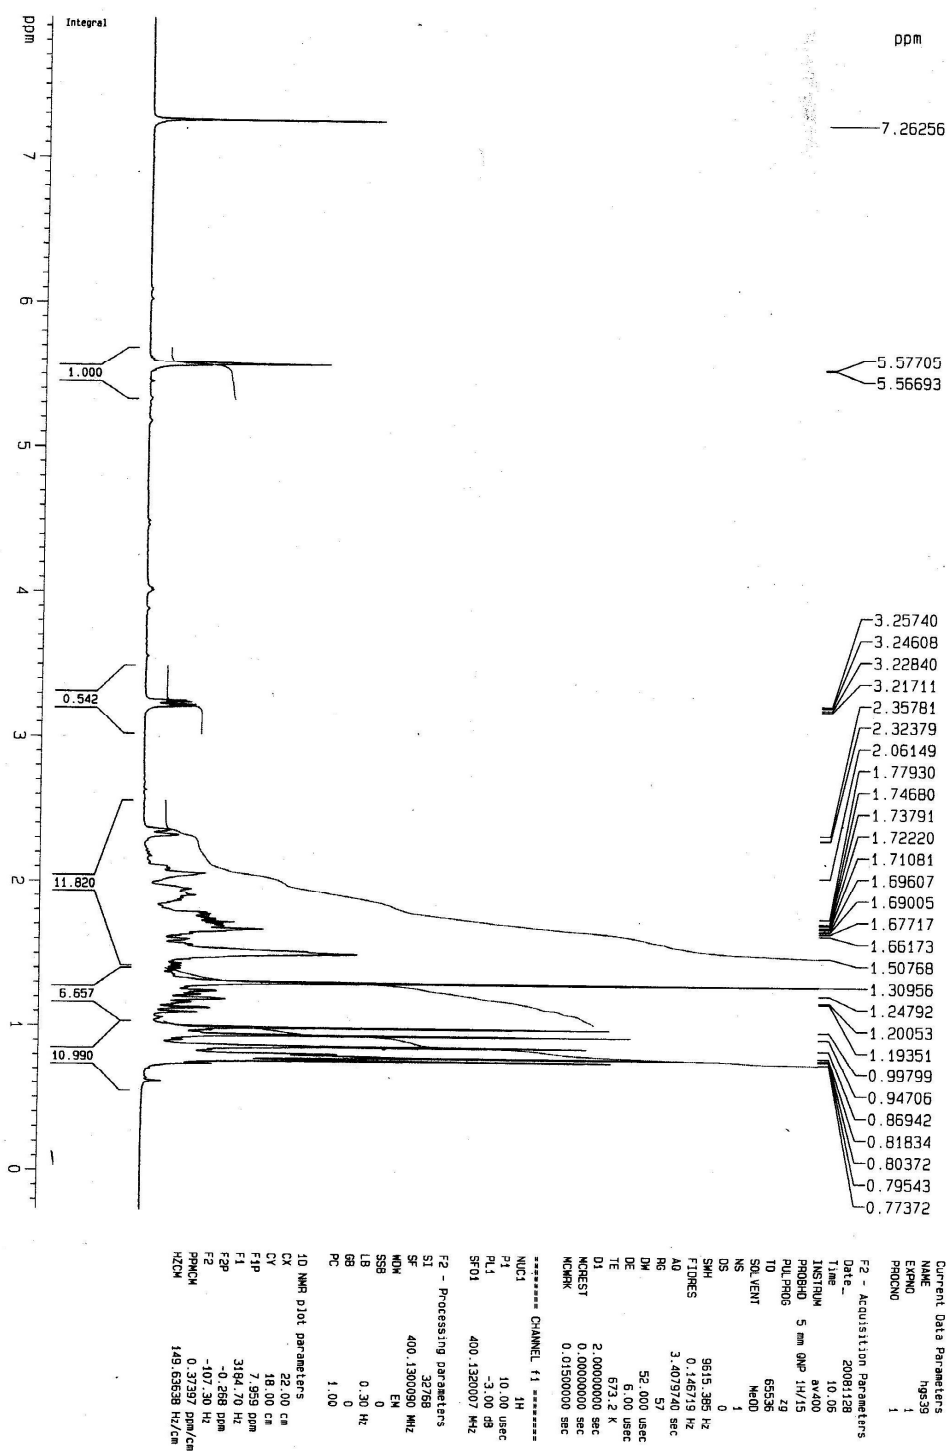



Figure S17.  $^{13}\text{C}$ -NMR Spectrum of **6** in  $\text{CDCl}_3$ .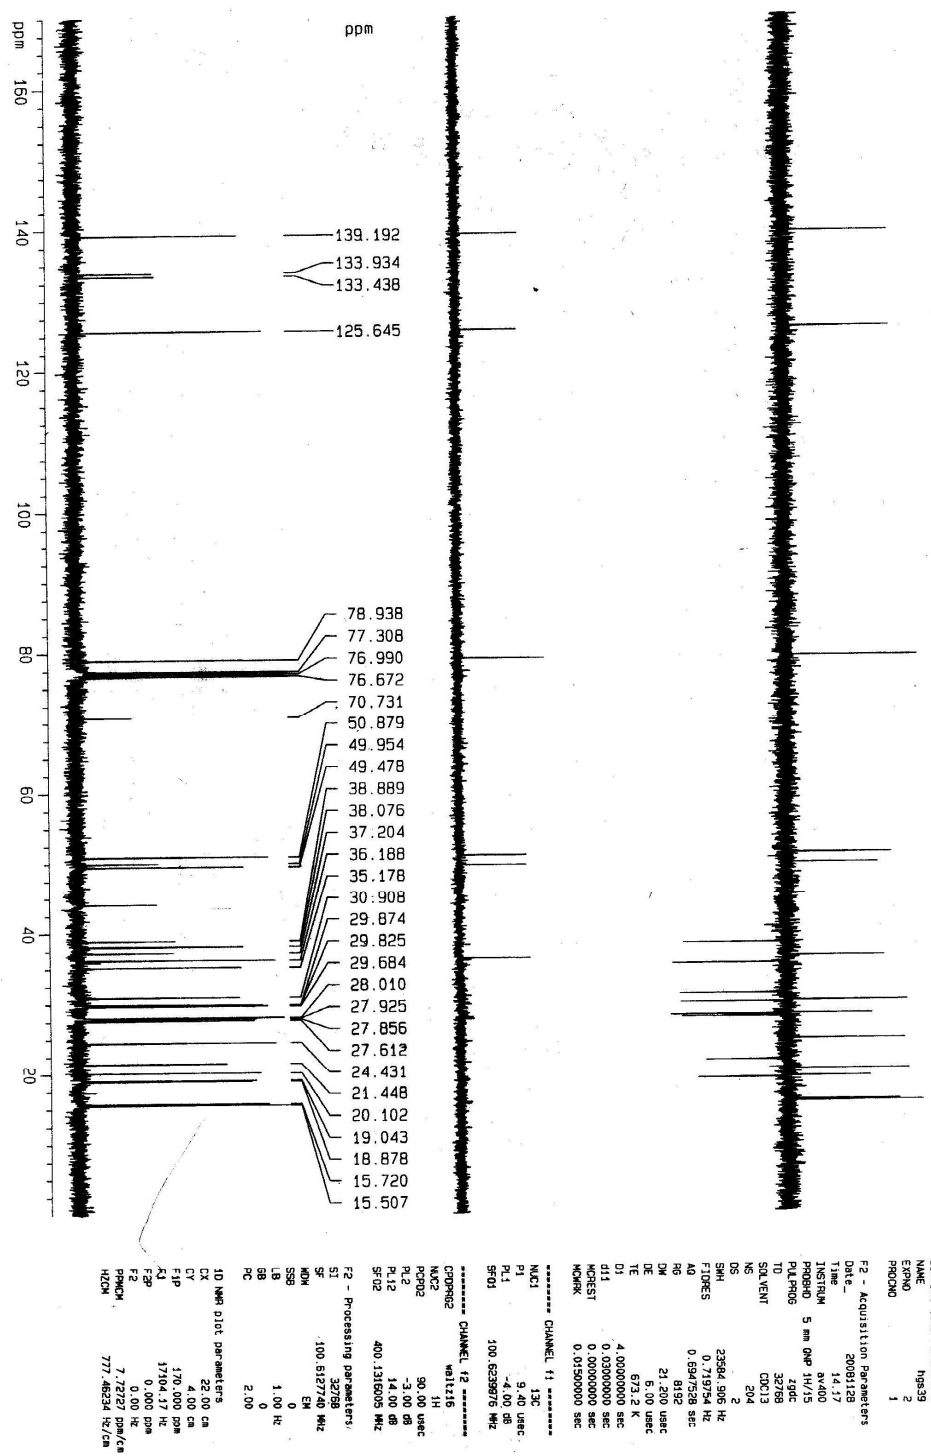

## Result of Biological Testing of 1–6.

Table 1. Inhibition of 11 $\beta$ -HSD1.

| Compounds and dose         | Mouse 11 $\beta$ -HSD1 | Human 11 $\beta$ -HSD1 |
|----------------------------|------------------------|------------------------|
| Compound-1 1 $\mu$ M       | 90.99%                 | 85.76%                 |
| Compound-1 10 $\mu$ M      | 99.75%                 | 95.72%                 |
| Compound-2 1 $\mu$ M       | 42.52%                 | 40.29%                 |
| Compound-2 10 $\mu$ M      | 93.61%                 | 78.08%                 |
| Compound-3 1 $\mu$ M       | 95.74%                 | 96.85%                 |
| Compound-3 10 $\mu$ M      | 100.49%                | 97.67%                 |
| Compound-4 1 $\mu$ M       | 99.00%                 | 96.97%                 |
| Compound-4 10 $\mu$ M      | 100.17%                | 96.00%                 |
| Compound-5 1 $\mu$ M       | 95.40%                 | 93.10%                 |
| Compound-5 10 $\mu$ M      | 100.08%                | 97.10%                 |
| Compound-6 1 $\mu$ M       | 92.90%                 | 96.83%                 |
| Compound-6 10 $\mu$ M      | 100.17%                | 97.93%                 |
| glycyrrhizinic acid 1 nM   | 27.43%                 | 13.48%                 |
| glycyrrhizinic acid 10 nM  | 56.62%                 | 48.34%                 |
| glycyrrhizinic acid 100 nM | 91.47%                 | 84.45%                 |

Table 2. IC<sub>50</sub> for mouse 11 $\beta$ -HSD1(X  $\pm$  SD, n = 2).

| Compounds and dose       | Mean   | SD    | IC <sub>50</sub> |
|--------------------------|--------|-------|------------------|
| Compound-1 0.01 $\mu$ M  | 13.69% | 4.55% | 78.44 nM         |
| Compound-1 0.03 $\mu$ M  | 27.94% | 5.31% |                  |
| Compound-1 0.1 $\mu$ M   | 53.48% | 0.71% |                  |
| Compound-1 0.3 $\mu$ M   | 72.93% | 0.51% |                  |
| Compound-1 1 $\mu$ M     | 89.37% | 0.13% |                  |
| Compound-2 0.1 $\mu$ M   | 16.21% | 0.77% | 1.077 $\mu$ M    |
| Compound-2 0.3 $\mu$ M   | 28.98% | 4.37% |                  |
| Compound-2 1 $\mu$ M     | 46.71% | 0.03% |                  |
| Compound-2 3 $\mu$ M     | 70.48% | 3.49% |                  |
| Compound-2 10 $\mu$ M    | 90.75% | 0.76% |                  |
| Compound-3 0.01 $\mu$ M  | 21.44% | 3.85% | 80.52 nM         |
| Compound-3 0.03 $\mu$ M  | 29.00% | 3.15% |                  |
| Compound-3 0.1 $\mu$ M   | 57.01% | 4.76% |                  |
| Compound-3 0.3 $\mu$ M   | 80.27% | 0.55% |                  |
| Compound-3 1 $\mu$ M     | 95.34% | 0.45% |                  |
| Compound-4 0.003 $\mu$ M | 20.72% | 0.87% | 13.36 nM         |
| Compound-4 0.01 $\mu$ M  | 42.25% | 3.83% |                  |
| Compound-4 0.03 $\mu$ M  | 72.02% | 2.13% |                  |
| Compound-4 0.1 $\mu$ M   | 92.55% | 0.82% |                  |
| Compound-4 0.3 $\mu$ M   | 97.02% | 1.58% |                  |

**Table 2.** *Cont.*

| Compounds and dose          | Mean   | SD    | IC <sub>50</sub> |
|-----------------------------|--------|-------|------------------|
| Compound-5 0.01 $\mu$ M     | 25.25% | 2.71% | 49.46 nM         |
| Compound-5 0.03 $\mu$ M     | 40.53% | 0.20% |                  |
| Compound-5 0.1 $\mu$ M      | 58.85% | 2.69% |                  |
| Compound-5 0.3 $\mu$ M      | 79.71% | 0.58% |                  |
| Compound-5 1 $\mu$ M        | 94.14% | 2.23% |                  |
| Compound-6 0.01 $\mu$ M     | 28.95% | 0.97% | 294.7 nM         |
| Compound-6 0.03 $\mu$ M     | 24.50% | 0.85% |                  |
| Compound-6 0.1 $\mu$ M      | 44.58% | 1.76% |                  |
| Compound-6 0.3 $\mu$ M      | 69.55% | 1.48% |                  |
| Compound-6 1 $\mu$ M        | 91.49% | 2.25% |                  |
| glycyrrhizininc acid 1 nM   | 27.40% | 0.61% | 3.601 nM         |
| glycyrrhizininc acid 10 nM  | 64.74% | 4.65% |                  |
| glycyrrhizininc acid 100 nM | 92.93% | 3.09% |                  |

**Table 3.** IC<sub>50</sub> for human 11 $\beta$ -HSD1(X  $\pm$  SD, n = 2).

| Compounds and dose        | Mean   | SD    | IC <sub>50</sub> |
|---------------------------|--------|-------|------------------|
| Compound-1 0.01 $\mu$ M   | 35.06% | 1.55% | 34.86 nM         |
| Compound-1 0.03 $\mu$ M   | 40.01% | 3.19% |                  |
| Compound-1 0.1 $\mu$ M    | 60.09% | 0.57% |                  |
| Compound-1 0.3 $\mu$ M    | 80.31% | 2.48% |                  |
| Compound-1 1 $\mu$ M      | 88.50% | 3.46% |                  |
| Compound-2 0.1 $\mu$ M    | 13.88% | 4.84% | 1.115 $\mu$ M    |
| Compound-2 0.3 $\mu$ M    | 28.09% | 2.37% |                  |
| Compound-2 1 $\mu$ M      | 42.10% | 6.37% |                  |
| Compound-2 3 $\mu$ M      | 59.31% | 5.51% |                  |
| Compound-2 10 $\mu$ M     | 82.58% | 3.56% |                  |
| Compound-3 0.001 $\mu$ M  | 16.42% | 4.67% | 16.08 nM         |
| Compound-3 0.003 $\mu$ M  | 24.21% | 0.36% |                  |
| Compound-3 0.01 $\mu$ M   | 41.73% | 3.03% |                  |
| Compound-3 0.03 $\mu$ M   | 67.99% | 1.18% |                  |
| Compound-3 0.1 $\mu$ M    | 91.82% | 3.12% |                  |
| Compound-4 0.0003 $\mu$ M | 15.74% | 4.77% | 2.815 nM         |
| Compound-4 0.001 $\mu$ M  | 26.63% | 0.41% |                  |
| Compound-4 0.003 $\mu$ M  | 51.49% | 5.33% |                  |
| Compound-4 0.01 $\mu$ M   | 75.03% | 1.42% |                  |
| Compound-4 0.03 $\mu$ M   | 90.37% | 0.87% |                  |
| Compound-5 0.003 $\mu$ M  | 20.54% | 2.49% | 26.47 nM         |
| Compound-5 0.01 $\mu$ M   | 28.39% | 3.41% |                  |
| Compound-5 0.03 $\mu$ M   | 56.15% | 0.05% |                  |
| Compound-5 0.1 $\mu$ M    | 82.07% | 0.72% |                  |
| Compound-5 0.3 $\mu$ M    | 95.27% | 2.67% |                  |

**Table 3.** *Cont.*

| Compounds and dose         | Mean   | SD    | IC <sub>50</sub> |
|----------------------------|--------|-------|------------------|
| Compound-6 0.01 µM         | 36.41% | 6.95% | 15.99 nM         |
| Compound-6 0.03 µM         | 67.93% | 1.02% |                  |
| Compound-6 0.1 µM          | 91.16% | 2.25% |                  |
| Compound-6 0.3 µM          | 96.00% | 2.24% |                  |
| Compound-6 1 µM            | 99.30% | 1.38% |                  |
| glycyrrhizinic acid 1 nM   | 15.32% | 0.28% | 8.626 nM         |
| glycyrrhizinic acid 10 nM  | 46.94% | 2.05% |                  |
| glycyrrhizinic acid 100 nM | 81.71% | 0.54% |                  |

**Table 4.** IC<sub>50</sub> for mouse 11β-HSD2(X ± SD, n = 2).

| Compounds and dose   | Mean   | SD     | IC <sub>50</sub> |
|----------------------|--------|--------|------------------|
| Compound-1 1 mM      | 20.94% | 5.78%  | >1 mM            |
| Compound-1 100 µM    | 7.04%  | 3.02%  |                  |
| Compound-2 1 mM      | 33.38% | 13.44% | >1 mM            |
| Compound-2 100 µM    | 22.09% | 1.02%  |                  |
| Compound-2 10 µM     | 8.65%  | 0.48%  |                  |
| Compound-3 1 mM      | 28.00% | 12.62% | >1 mM            |
| Compound-3 100 µM    | 35.55% | 7.49%  |                  |
| Compound-3 10 µM     | 6.57%  | 0.43%  |                  |
| Compound-4 1 mM      | 16.24% | 5.71%  | >1mM             |
| Compound-4 100 µM    | 23.82% | 0.75%  |                  |
| Compound-5 1 mM      | 16.00% | 0.35%  | >1 mM            |
| Compound-5 100 µM    | 30.11% | 3.64%  |                  |
| Compound-5 10 µM     | 15.32% | 2.77%  |                  |
| Compound-6 1 mM      | 5.65%  | 4.60%  | >1 mM            |
| Compound-6 100 µM    | 32.96% | 1.60%  |                  |
| Compound-6 10 µM     | 22.76% | 1.31%  |                  |
| carbenoxolone 1 nM   | 3.90%  | 2.06%  | 59.16 nM         |
| carbenoxolone 10 nM  | 21.11% | 3.50%  |                  |
| carbenoxolone 100 nM | 47.75% | 5.98%  |                  |
| carbenoxolone 1 µM   | 64.68% | 10.20% |                  |
| carbenoxolone 10 µM  | 84.31% | 1.36%  |                  |

**Table 5.** IC<sub>50</sub> for human 11 $\beta$ -HSD2 (X  $\pm$  SD, n = 2).

| Compounds and dose          | Mean     | SD     | IC <sub>50</sub> |
|-----------------------------|----------|--------|------------------|
| Compound-1 30 $\mu$ M       | 94.44%   | 4.33%  | 8.179 $\mu$ M    |
| Compound-1 10 $\mu$ M       | 57.44%   | 3.43%  |                  |
| Compound-1 3 $\mu$ M        | 39.24%   | 2.43%  |                  |
| Compound-1 1 $\mu$ M        | 21.70%   | 2.18%  |                  |
| Compound-2 100 $\mu$ M      | 103.39%  | 14.83% | 2.626 $\mu$ M    |
| Compound-2 30 $\mu$ M       | 83.33%   | 4.60%  |                  |
| Compound-2 10 $\mu$ M       | 52.52%   | 2.51%  |                  |
| Compound-2 3 $\mu$ M        | 31.43%   | 2.65%  |                  |
| Compound-3 3 $\mu$ M        | 103.59%  | 15.43% | 0.3952 $\mu$ M   |
| Compound-3 1 $\mu$ M        | 66.20%   | 8.04%  |                  |
| Compound-3 0.3 $\mu$ M      | 52.11%   | 1.71%  |                  |
| Compound-3 0.1 $\mu$ M      | 32.47%   | 2.12%  |                  |
| Compound-4 0.3 $\mu$ M      | 97.51%   | 5.20%  | 0.107 $\mu$ M    |
| Compound-4 0.1 $\mu$ M      | 58.39%   | 5.33%  |                  |
| Compound-4 0.03 $\mu$ M     | 36.08%   | 2.54%  |                  |
| Compound-4 0.01 $\mu$ M     | 24.88%   | 4.28%  |                  |
| Compound-5 10 $\mu$ M       | 98.14%   | 0.52%  | 1.687 $\mu$ M    |
| Compound-5 3 $\mu$ M        | 75.21%   | 3.89%  |                  |
| Compound-5 1 $\mu$ M        | 42.46%   | 3.33%  |                  |
| Compound-5 0.3 $\mu$ M      | 13.84%   | 5.85%  |                  |
| Compound-6 3 $\mu$ M        | 73.75%   | 3.11%  | 0.6664 $\mu$ M   |
| Compound-6 1 $\mu$ M        | 51.03%   | 4.83%  |                  |
| Compound-6 0.3 $\mu$ M      | 30.78%   | 2.77%  |                  |
| Compound-6 0.1 $\mu$ M      | 7.44%    | 4.64%  |                  |
| glycyrrhizinic acid 0.01 nM | 0.054304 | 0.55%  | 2.246 nM         |
| glycyrrhizinic acid 0.1 nM  | 0.205319 | 5.75%  |                  |
| glycyrrhizinic acid 1 nM    | 0.38055  | 1.37%  |                  |
| glycyrrhizinic acid 10 nM   | 0.698451 | 3.45%  |                  |
| glycyrrhizinic acid 100 nM  | 0.981153 | 2.55%  |                  |
